# Supplementary material
Source: Springer Nature journal article supplement (https://www.springermedizin.de/resource/supplementary/12950_2010_167_MOESM3_ESM.pdf/9558104)

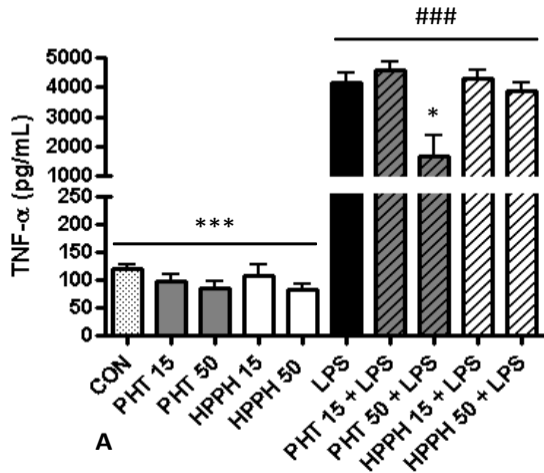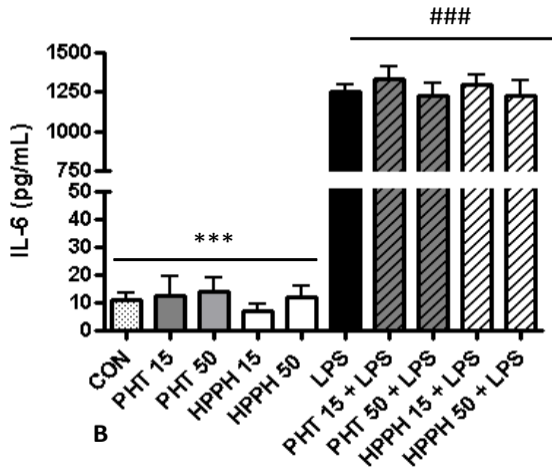

Supplement: MOESM3 [file 9558104]
